# Supplementary material for: Drought Sensitivity of Sugarcane Cultivars Shapes Rhizosphere Bacterial Community Patterns in Response to Water Stress
Source: PubMed Central journal article supplement (PMC8568056; doi:10.3389/fmicb.2021.732989), 2021-10-21

# Supplementary Materials

**Supplementary Fig.1** Statistics of soil water content in different treatments

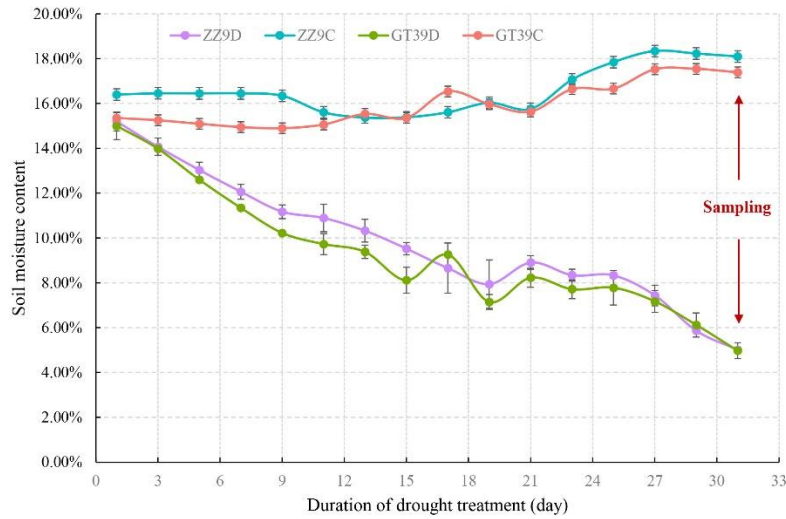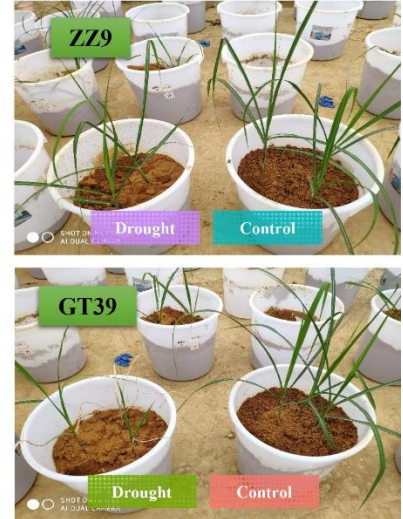

**Supplementary Fig.2** Schematic diagram of Sample collection

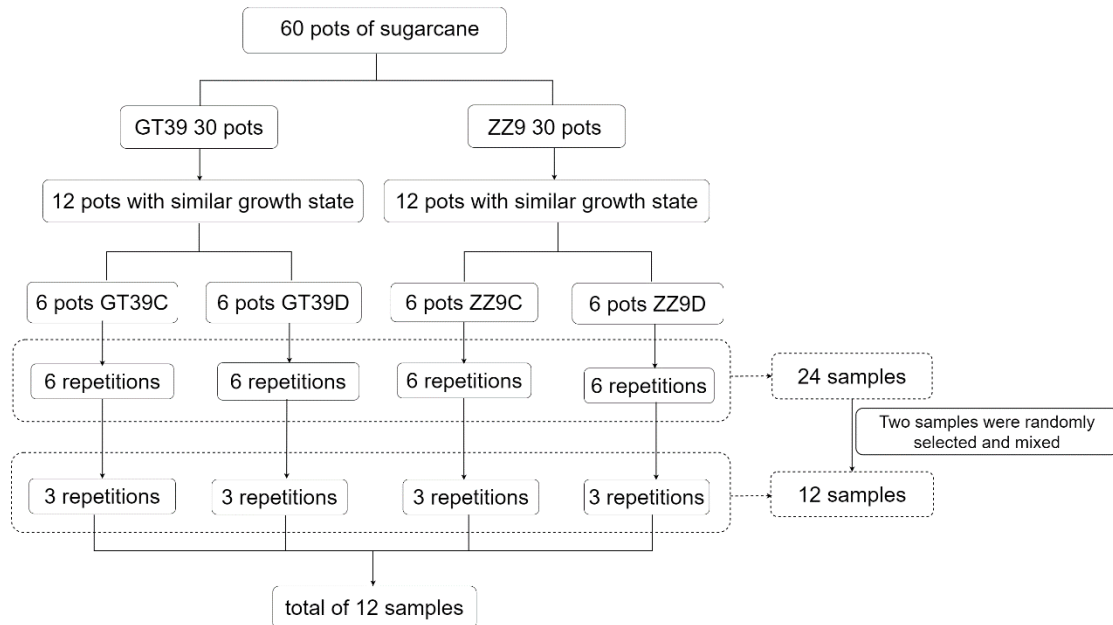

**Supplementary Fig.3** ZZ9 rhizosphere bacteria OTUs module aggregation number statistics

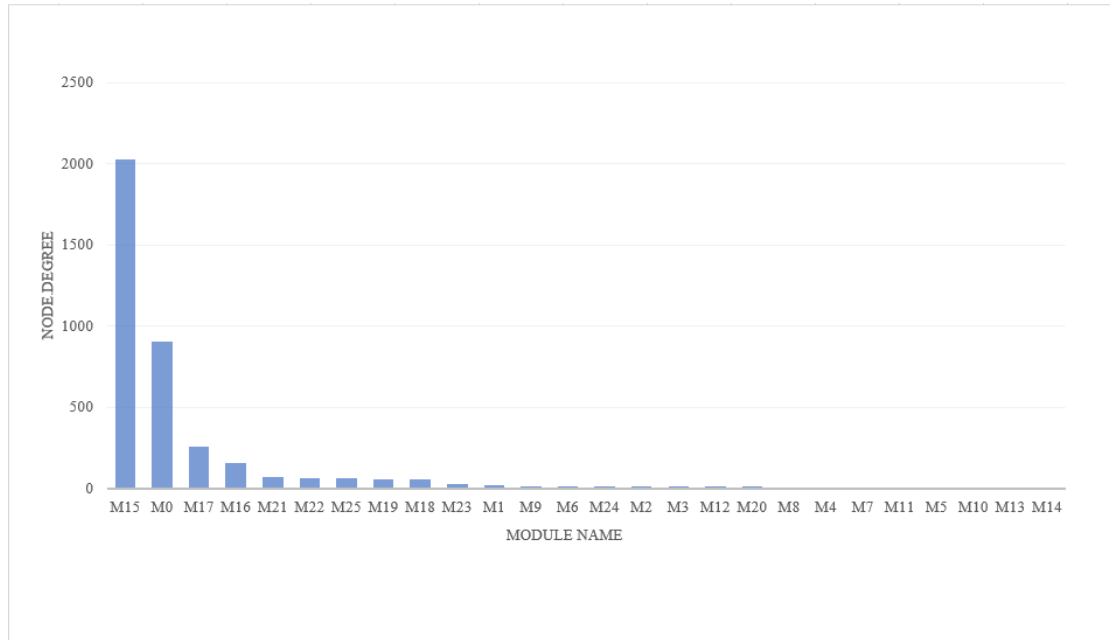

**Supplementary Fig.4** GT39 rhizosphere bacteria OTUs module aggregation number statistics

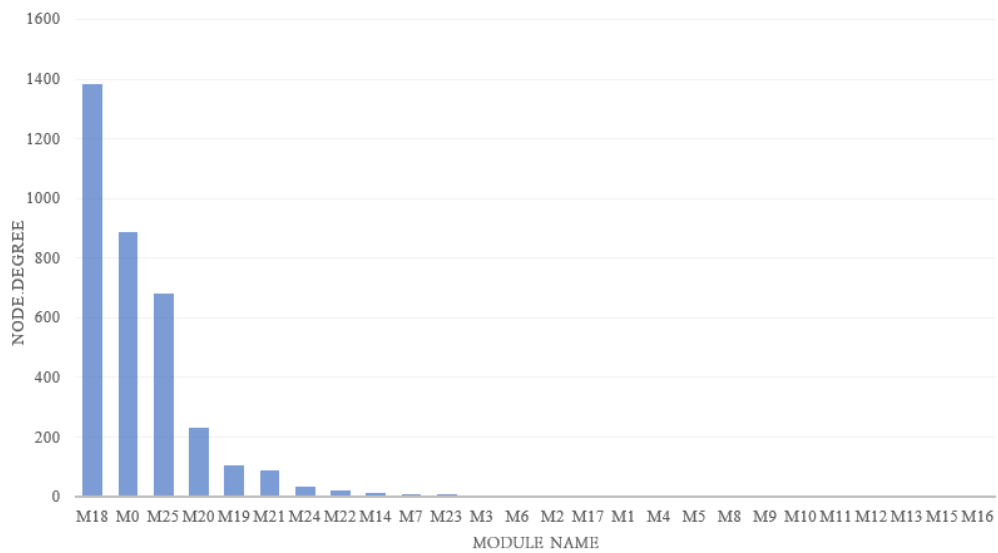

Supplement: Data_sheet_1.pdf [file Data_sheet_1.pdf]
